# Supplementary material for: Circular RNA circ0104103 inhibits colorectal cancer progression through interactions with HuR and miR‐373‐5p
Source: PubMed Central journal article supplement — Cancer Sci. 2023 Jan 11;114(4):1396–409. doi: 10.1111/cas.15695 (PMC10067388; doi:10.1111/cas.15695), 2023-01-11
Supplement: CAS-114-1396-s001.pdf [file CAS-114-1396-s001.pdf]

Circ-0104103

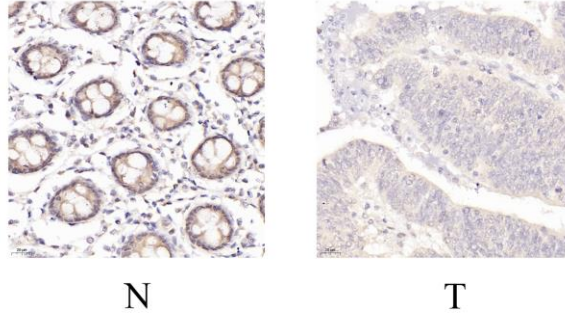

**FIGURE S1** Expression and characterization of circ0104103 in CRC. Representative images of circ0104103 expression in CRC and adjacent colorectal tissues detected by ISH in our CRC cohort.

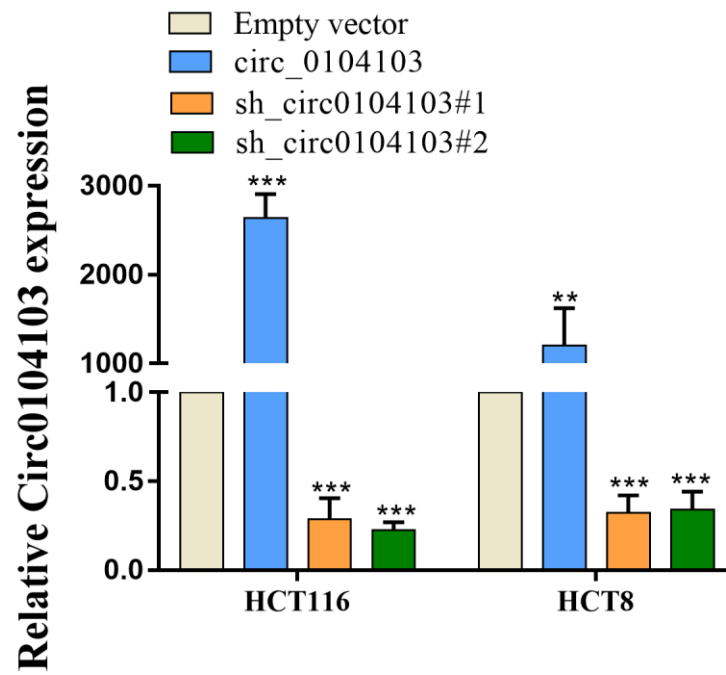

**FIGURE S2** Circ0104103 inhibits CRC cell growth and metastasis *in vitro*. Circ0104103 were quantified by qRT-PCR after transfection of circ0104103 or sh-circ0104103 in CRC cells. \* $P < 0.05$ , \*\* $P < 0.01$ , and \*\*\* $P < 0.001$

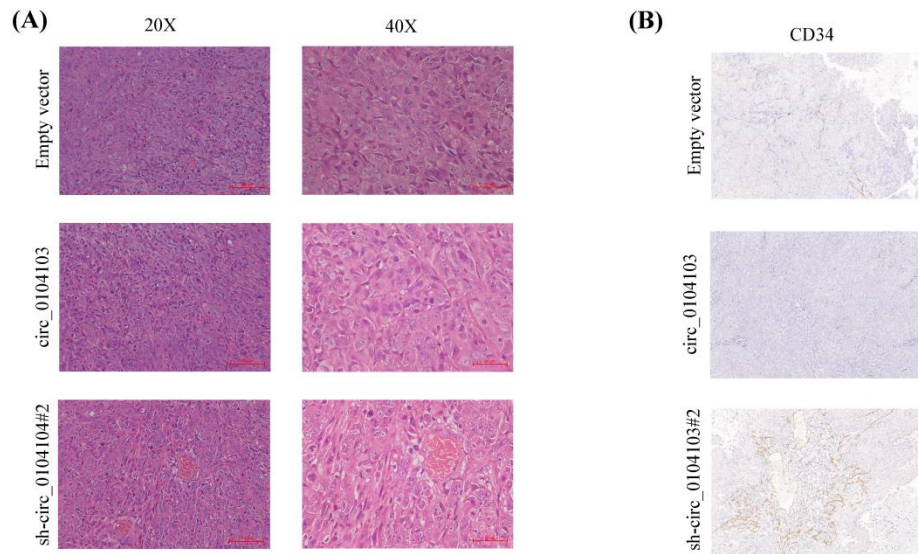

**FIGURE S3** Circ0104103 inhibits CRC cell growth and metastasis *in vivo*. A, compared with the Empty vector groups and Circ0104103 groups, more blood vessels could be seen in the HE staining images of subcutaneous tumors in the sh-circ0104103#2 groups. B, Label blood vessels by CD34.

(A)

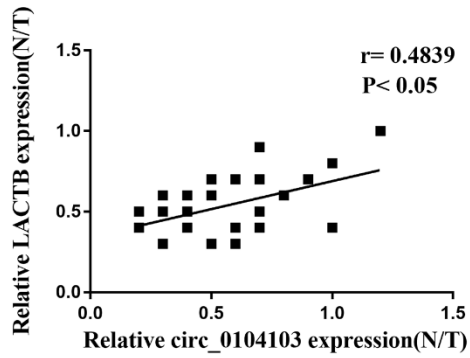

(B)

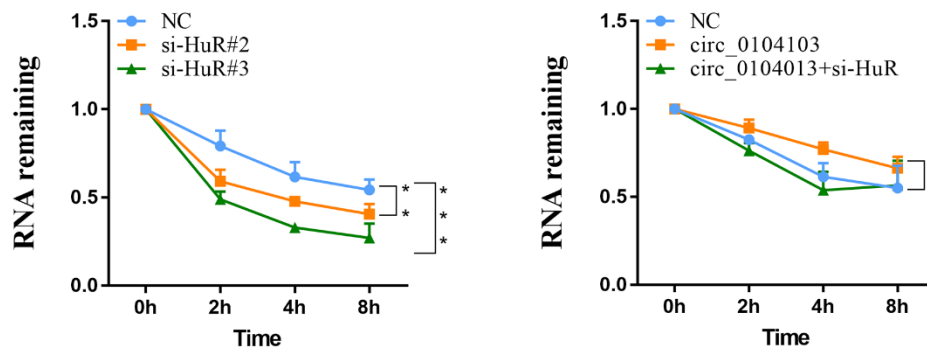

**FIGURE S4** circ0104103 enhances LACTB expression in CRC. A, the correlation between circ0104103 and LACTB expression analyzed in 30 paired colorectal cancer samples ( $r=0.4839$ ,  $P<0.05$ ). B, qRT-PCR estimated the influences of circ0104103/HuR on the mRNA stability of LACTB in HCT116 cells treated with actinomycin D. \* $P < 0.05$ , \*\* $P < 0.01$ , and \*\*\* $P < 0.001$

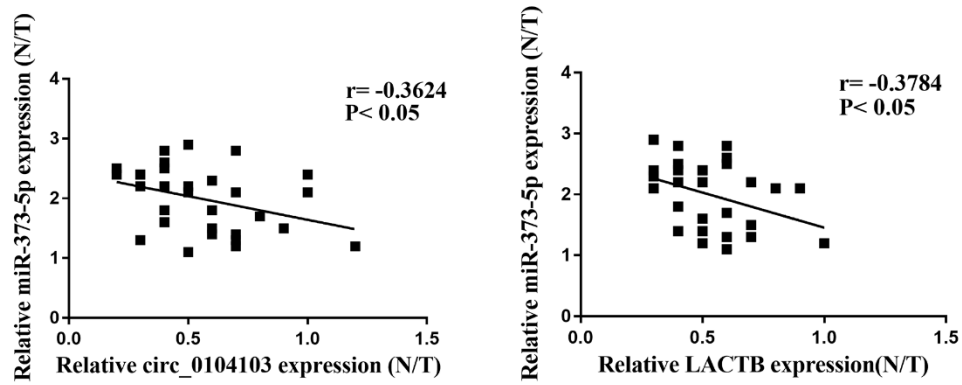

**FIGURE S5** circ0104103 upregulates LACTB expression by sponging miR-373-5p. The correlation between circ0104103 and miR-373-5p expression analyzed in 30 paired colorectal cancer samples ( $r = -0.3624$ ,  $P < 0.05$ ). The correlation between miR-373-5p and LACTB expression analyzed in 30 paired colorectal cancer samples ( $r = -0.3784$ ,  $P < 0.05$ ).
