# Supplementary material for: Circular RNA circ0104103 inhibits colorectal cancer progression through interactions with HuR and miR‐373‐5p
Source: PubMed Central journal article supplement — Cancer Sci. 2023 Jan 11;114(4):1396–409. doi: 10.1111/cas.15695 (PMC10067388; doi:10.1111/cas.15695), 2023-01-11
Supplement: CAS-114-1396-s002.pdf [file CAS-114-1396-s002.pdf]

**Table S1: RNA sequence.**

| <b>siRNAs</b>  | <b>target sequence</b> |
|----------------|------------------------|
| si-LACTB       | GTGGAATTCGTCATTATGA    |
| si-HuR#1       | GACCCAGGATGAGTTACGA    |
| si-HuR#2       | GAGCGATCAACACGCTGAA    |
| si-HuR#3       | GGTTGCGTTTATCCGGTTT    |
| <b>shRNAs</b>  | <b>target sequence</b> |
| sh-circ#1      | ATAGAGCAAGGTTTAGGTTAT  |
| sh-circ#2      | GCAAGGTTTAGGTTATGCTGA  |
| <b>LV-RNAs</b> | <b>target sequence</b> |
| LV-circ        | TCAGGATGTAAATATTTGGA   |

**Table S2: The list of primers and probes.****qPCR primers**

|              |                           |                         |
|--------------|---------------------------|-------------------------|
| U6           | CTCGCTTCGGCAGCACA         | AACGCTTCACGAATTTGCGT    |
| GAPDH        | GGGAGCCAAAAGGGTCATCA      | TGATGGCATGGACTGTGGTC    |
| Circ_0104103 | CCATAGTAGAGAGAGCTTCAGGATG | ATCAGCATAACCTAACCTTGCTC |
| LACTB        | GCACAGGATCAAGGATGAGGT     | TCTGGTTTACATGGTACACGGTT |
| miR-373-5p   | TACTCAAATGGGGGCGCTTTCC    |                         |
| HuR          | GTGAAAATGATGACGGGCTTG     | GAGAATGTTCTGAACTGAGAACT |

**Table S3. The clinical characters of 30 CRC patients.**

| Characteristics              | Number of cases | circ0104103 expression |             | P value <sup>a</sup> |
|------------------------------|-----------------|------------------------|-------------|----------------------|
|                              |                 | Low (n=15)             | High (n=15) |                      |
| <b>Age(year)</b>             |                 |                        |             |                      |
| <60                          | 12              | 7                      | 5           | 0.456                |
| ≥60                          | 18              | 8                      | 10          |                      |
| <b>Gender</b>                |                 |                        |             |                      |
| Female                       | 10              | 6                      | 4           | 0.439                |
| Male                         | 20              | 9                      | 11          |                      |
| <b>Tumor invasion depth</b>  |                 |                        |             |                      |
| T1-2                         | 18              | 6                      | 12          | <b>0.025</b>         |
| T3-4                         | 12              | 9                      | 3           |                      |
| <b>Lymph node metastasis</b> |                 |                        |             |                      |
| N0                           | 21              | 9                      | 12          | 0.232                |
| N1+N2                        | 9               | 6                      | 3           |                      |
| <b>Distant metastasis</b>    |                 |                        |             |                      |
| M0                           | 24              | 11                     | 14          | 0.083                |
| M1+M2                        | 6               | 5                      | 1           |                      |
| <b>TNM stage</b>             |                 |                        |             |                      |
| I+II                         | 17              | 5                      | 12          | <b>0.010</b>         |
| III+III                      | 13              | 10                     | 3           |                      |
